# Supplementary material for: Increasing Fruit and Vegetable Intake of Primary School Children in a Quasi-Randomized Trial: Evaluation of the Three-Year School-Based Multicomponent Intervention
Source: MDPI journal article supplement (doi:10.3390/nu14194197), 2022-10-08
Supplement: s1 [file s1]

**Table S1.** Comparison characteristics of non-completers and completers in the control and intervention groups at baseline <sup>1</sup>.

| Parameter                                       | Control group (n=300) |              |                      | Intervention group (n=381) |              |                      |
|-------------------------------------------------|-----------------------|--------------|----------------------|----------------------------|--------------|----------------------|
|                                                 | Non-completers        | Completers   | p Value <sup>2</sup> | Non-completers             | Completers   | p Value <sup>2</sup> |
| <b>Participants (n)</b>                         | 184                   | 116          | – <sup>3</sup>       | 238                        | 143          | – <sup>3</sup>       |
| <b>Age (yr.)</b>                                | 7.7 ± 0.3             | 7.7 ± 0.3    | 0.795                | 8.6 ± 0.3                  | 7.7 ± 0.4    | 0,251                |
| <b>Sex (%):</b>                                 |                       |              |                      |                            |              |                      |
| Boys                                            | 51.6                  | 49.1         | 0.812                | 48.9                       | 50.3         | 0.791                |
| Girls                                           | 48.4                  | 50.9         |                      | 51.1                       | 49.7         |                      |
| <b>Body height (cm)</b>                         | 134.8 ± 6.0           | 135.4 ± 6.2  | 0.322                | 135.5 ± 5.7                | 135.5 ± 5.7  | 0,949                |
| <b>Body height-for-age z-score</b>              | 0.8 ± 1.0             | 0.9 ± 1.1    | 0.157                | 0.9 ± 0.9                  | 0.9 ± 0.9    | 0,776                |
| <b>Body weight (kg)</b>                         | 31.2 ± 7.2            | 30.7 ± 5.9   | 0.550                | 31.7 ± 6.6                 | 32.2 ± 7.0   | 0.432                |
| <b>Body weight-for-age z-score</b>              | 0.7 ± 1.1             | 0.7 ± 1.1    | 0.918                | 0.9 ± 1.1                  | 0.9 ± 1.1    | 0.481                |
| <b>Body mass index (kgm<sup>-2</sup>)</b>       | 17.0 ± 2.8            | 16.6 ± 2.3   | 0.159                | 17.1 ± 2.8                 | 17.4 ± 2.9   | 0.373                |
| <b>Body mass index-for-age z-score</b>          | 0.4 ± 1.2             | 0.2 ± 1.1    | 0.217                | 0.4 ± 1.2                  | 0.6 ± 1.2    | 0.323                |
| <b>Physical activity level</b>                  | 3.0 ± 0.5             | 3.1 ± 0.7    | 0.986                | 3.0 ± 0.5                  | 3.1 ± 0.6    | 0,923                |
| <b>Sleep time (min/day)</b>                     | 585.4 ± 23.9          | 580.9 ± 34.2 | 0.599                | 590.3 ± 33.5               | 589.1 ± 32.2 | 0,897                |
| <b>Screen time (min/day)</b>                    | 120.5 ± 50.8          | 141.8 ± 76.8 | 0.325                | 146.8 ± 82.1               | 134.3 ± 63.2 | 0.913                |
| <b>Household income (%):</b>                    |                       |              |                      |                            |              |                      |
| < 5000.00 kn (664.92 €)                         | 0.0                   | 3.4          | 0,351                | 8.0                        | 1.0          | 0.420                |
| 5000,00 kn – 8000,00 kn (664.93 – 1063.87 €)    | 17.2                  | 5.7          |                      | 8.0                        | 7.3          |                      |
| 8000,01 kn – 14000,00 kn (1063.88 – 1861.77 €)  | 31.0                  | 34.5         |                      | 32.0                       | 35.4         |                      |
| 14000,01 kn – 18000,00 kn (1861.78 – 2393.70 €) | 24.2                  | 19.5         |                      | 24.0                       | 24.0         |                      |
| ≥ 18000,01 kn (≥ 2393.71 €)                     | 27.6                  | 36.8         |                      | 28.0                       | 32.3         |                      |

<sup>1</sup> Continuous variable are presented as mean ± standard deviation, while categorical as number or percentages. <sup>2</sup> Differences between groups were tested using Student's t-test for continuous parametric variables, Mann-Whitney U test for continuous non-parametric variables and Chi-square test for categorical variables (p < 0.05). <sup>3</sup> Statistical analyzes was not performed.
